# Supplementary material for: Diversifying Selection Underlies the Origin of Allozyme Polymorphism at the Phosphoglucose Isomerase Locus in Tigriopus californicus
Source: PubMed Central journal article supplement (PMC3386920; doi:10.1371/journal.pone.0040035), 2012-06-29
Supplement: pone.0040035.s003.pdf [file pone.0040035.s003.pdf]

Schoville, S.D., J.M. Flowers, and R.S. Burton. 2012. Diversifying selection underlies the origin of allozyme polymorphism at the phosphoglucose isomerase locus in *Tigriopus californicus*

**Table S3.** Non-singleton polymorphisms from San Diego (SD) and Laguna Beach (LB). The polymorphism responsible for the  $Pgi^F$  allele is indicated in bold. The electrophoretic allele class,  $Pgi^F$ ,  $Pgi^M$  or  $Pgi^S$ , of each sequence is indicated by an F, M, or S next to the sample ID. Singleton sites have been omitted from the alignment. Numbers at the top of the table are the positions in the global alignment of all populations.

| ID     | Polymorphic sites  |            |           |
|--------|--------------------|------------|-----------|
|        | 34444455           | 8801334557 | 789933345 |
|        | 2671778849         | 2316126030 | 704714626 |
|        | 1329781211         | 2719193602 | 520784525 |
| SD98M  | GCAGCTCAGG         | GAAGGTTTCA | TGACCTATC |
| SD99M  | .....              | .....      | .....     |
| SD100M | ATC.GAGGAC         | TG.CACCA.G | .TG...GCA |
| SD101M | .....              | .....      | .....     |
| SD102M | .....              | .....      | .....A    |
| SD103M | .....              | .....      | .....GCA  |
| SD106M | AT.....A.          | TG.CACCA.G | .....A    |
| SD107F | ... <b>A</b> ..... | TG.CACCAT. | .TG...GCA |
| SD108M | .....              | ...CACCAT. | .TG...GCA |
| SD109F | AT. <b>A</b> ..... | .....      | .....A    |
| SD110M | AT.....            | .....      | .....A    |
| SD112M | .....              | .....      | .....A    |
| SD113M | ATC.GAGGAC         | TGGCACCA.G | .TG...GCA |
| SD118M | A.C.GAGGA.         | ..G.....   | .....G    |
| LB4M   | ..C.GAGGA.         | TG.CACCA.G | G.GTTG..A |
| LB17S  | ..C.GAGGA.         | T..CACCA.G | G.GTTG..A |
