# Supplementary material for: Diversifying Selection Underlies the Origin of Allozyme Polymorphism at the Phosphoglucose Isomerase Locus in Tigriopus californicus
Source: PubMed Central journal article supplement (PMC3386920; doi:10.1371/journal.pone.0040035), 2012-06-29
Supplement: pone.0040035.s004.pdf [file pone.0040035.s004.pdf]

Schoville, S.D., J.M. Flowers, and R.S. Burton. 2012. Diversifying selection underlies the origin of allozyme polymorphism at the phosphoglucose isomerase locus in *Tigriopus californicus*

**Table S4.** Inter-population distances at *Pgi* based upon coding regions corrected by the method of Jukes and Cantor (1969). Distances are net between-population means (i.e., corrected for within population distances).

|     | PA    | PM    | SD    | LB    | AB    | CA    | SCN   | PES |
|-----|-------|-------|-------|-------|-------|-------|-------|-----|
| PA  | -     |       |       |       |       |       |       |     |
| PM  | 0.084 | -     |       |       |       |       |       |     |
| SD  | 0.082 | 0.021 | -     |       |       |       |       |     |
| LB  | 0.083 | 0.023 | 0.003 | -     |       |       |       |     |
| AB  | 0.083 | 0.026 | 0.019 | 0.02  | -     |       |       |     |
| CA  | 0.080 | 0.024 | 0.02  | 0.019 | 0.02  | -     |       |     |
| SCN | 0.078 | 0.02  | 0.015 | 0.015 | 0.016 | 0.014 | -     |     |
| PES | 0.080 | 0.02  | 0.016 | 0.015 | 0.017 | 0.015 | 0.002 | -   |
